# Supplementary material for: More than a Feeling: Dermatological Changes Impacted by Spaceflight
Source: Research Square preprint supplement (doi:10.21203/rs.3.rs-2367727/v1), 2023-02-10
Supplement: Supplementary file 1 [file 4017caf65bc3ba29871d98c6.xlsx]

## Sheet: Sheet1
Authors	Date	Title/link	Organisms	Sample type/ tissue	Replicates	Study design	Duration	Analyses Performed (e.g. histology, proteomics)	Findings
Wen et all	2022	Wound Healing Effects of Dracontomelon dao on Bacterial Infection Wounds in Rats and Its Potential Mechanisms under Simulated Space Environment	Rat	Rat skin	4 groups (Infection group, Low-dosage group, High-dosage group, Uninfection group) with each 21 rats. 7 rats per subgroup.	Ground, simulated microgravity	15 days in total	Wound healing	Dracontomelon dao (leaves) accelerate infective wound healing by regulating, amongst other things, the expression of cytokines and growth factors. It reduces inflammation and angiogenesis and improves the maturation of infective wounds. It could be conceived as a new agent for accelerating infective wound healing in space.
Xinhua Cao	2022	Research progress on the effects of microgravity and space radiation on astronauts’ health and nursing measures	Human	Skin	N/A	General review	N/A	Multi-omics	The most predominant changes that astronaut’s bodies undergo during space flight include telomere length dynamics and DNA damage, hemodynamic changes, changes in sympathetic and vagal pressure reflexes, loss of muscle mass, decreased bone mineral density, gender difference, sleep disturbance, change in immune system and increased cancer risk. The most common causes for these changes are space rad…
Braun et al	2021	Exercises and Skin Physiology During International Space Station Expeditions	Human	Skin-A, Skin-B	Various astronauts	ISS	N/A	Physiology	Increasing activities on the ISS’s cycle ergometer and arm-related exercises have a medium negative impact on skin volume. This indicates more fluid content in the skin. There were no correlations between sports activities and skin moisture/skin barrier function to be found.
Van Rompay	2021	Investigation of the potential interplay of spaceflight conditions on the skin	Human	Skin	Fibroblast mitigation = 5-8 technical replicates; ECM protein expression = 3	Various in vitro spaceflight simulators	24h on RPM, then 24h incubation	Genomics	Individual space stressors and/or a combination thereof can affect normal skin cell behavior upon wounding. In particular, cytoskeleton reorganization and altered collagen type I expression was observed in exposed NHDF cells, both important for cell migration, adhesion and proper wound healing.
Ricci et al	2021	Microgravity Induces Transient EMT in Human Keratinocytes by Early Down-Regulation of E-Cadherin and Cell-Adhesion Remodeling	Human	Keratinocytes cell culture	RPM 48h, RPM 72h, RPM 24h then 1g	Ground, simulated microgravity	1-3 days	Proteomics	HaCaT exposed to simulated microgravity show biphasic response; at 24h marker, they increase motility and invasiveness whereas after 48h and 72h, they return to a non-invasive phenotype
Lee et al	2021	Reference-guided metagenomics reveals genome-level evidence of potential microbial transmission from the ISS environment to an astronaut's microbiome	Human	Nasal Swabs	Metagenomic sequencing was performed on DNA extracted from nasal swabs collected from 5 astronauts at multiple time points before (n = 3 or 4), after 3 months (n = 3), and after (n = 3) their time aboard the ISS for 6-month missions	Ground, ISS	6 month missions	Microbiomics	This is the first report demonstrating colonization or enrichment of an ISS microbial population at the genomic level within an astronaut's nasal microbiome. Different nasal swabs were performed during the astronauts' mission, whereby after 3 months the test results indicated an increased recruitment of Staphylococcus aureus in the astronauts's nose.
Sugita et al	2020	The skin mycobiome of an astronaut during a 1-year stay on the International Space Station	Human (n=1; n=10)	Skin (chest and cheek)	FLT=1	ISS (Twins)	1 year; 6 months	Microbiomics, Mycobiomics	In addition to a presence of Cyberlindnera jadinii and Candida boidinii (uncommon skin mycobiome taxa), an increased relative abundance of Malassezia restricta and increased level of Malassezia colonization was found after analyzing an astronaut's skin mycobiome. Hence, longer future spaceflight missions should assess the effect of high levels of Malassezia colonization over longer periods on ast…
Law et al	2020	Postflight Rash and Skin Sensitivity Following a Year-Long Spaceflight Mission	Human (n=1)	Skin health in general	1 astronaut	ISS (Twins)	340 days	Histology	A prolonged lack of skin stimulation over the course of the year-long mission led to an astronaut’s postflight rash and skin sensitivity. Nevertheless, vascular, allergic, and immunologic causes cannot be ruled out, so more work will be needed to better understand this phenomenon and test potential mitigations.
Avila-Herrera et al	2020	Crewmember microbiome may influence microbial composition of ISS habitable surfaces	Human (n=1)	Body swabs of mouth, nose, ear, skin and saliva	Body swabs of mouth, nose, ear, skin and saliva that were collected at eight different time points pre-, during and post-flight. Additionally, environmental surface samples from eight different habitable locations in the ISS were collected from two flights.	ISS	135 days	Microbiomics, Metagenomics, Taxonomics	Skin, nostril, and ear samples are more similar in microbial composition to the ISS surfaces than mouth and saliva samples. Surface samples collected by the astronaut with the analyzed skin are more related than to the surface sample collected on the different flights. Additionally, species alpha diversity in saliva samples appears to decrease during flight and rebound after returning to Earth.
Kononikhin et al	2019	Proteome Profiling of the Exhaled Breath Condensate after Long-Term Spaceflights	Human (n=5)	Exhaled Breath Condensates	13 samples from 5 cosmonauts	"Protokon" experiment	169–199 days	Proteomics, genomics	Reveals a large group of proteins which take part in keratinization processes (CASP14, DSG1, DSP, JUP, and so on). Nine proteins (including KRT2, KRT9, KRT1, KRT10, KRT14, DCD, KRT6C, KRT6A, and KRT5) were detected in all three groups, of which ttests observed a significant change in KRT2 and KRT9 levels after landing; significant participation of detected proteins in pathogenic E. coli infection…
Braun et al	2019	Current Data on Effects of Long-Term Missions on the International Space Station on Skin Physiological Parameters	Human (n=6)	Skin	6 astronauts	ISS (Skin-B)	6 months	Physiological	No deterioration of the skin was found but rather an improvement in skin hydration and skin barrier function, and no changes or improvement in the appearance of the skin surface. Furthermore, the skin density and skin thickness as well as skin elasticity values were unchanged from pre-flight values. spaceflight has no negative impact on skin physiological parameters.
Braun et al	2019	Self-Reported Skin Changes by a Selected Number of Astronauts after Long-Duration Mission on ISS as Part of the Skin B Project	Human (n=8)	Skin	8 astronauts	ISS (Skin-B)	6 months	Surveys	23 skin symptoms were recorded by 8 nonatopic astronauts. Most commonly mentioned were peeling (21.74%), rash (17.39%), dryness (13.04%). It was shown that the skin symptoms correlate with poor hygiene on orbit, whereas the factor "environment" on the ISS plays a minor role. Surprisingly, 2 astronauts even experienced positive effects on their skin.
Buken et al	2019	Morphological and Molecular Changes in Juvenile Normal Human Fibroblasts Exposed to Simulated Microgravity	Human culture	Skin (NHDF) culture	Simulated microgravity group and control group	1g, simulated microgravity	3 days	Proteomics	Simulated microgravity induces changes in the cytoskeleton, extracellular matrix, focal adhesion and growth behavior of the investigated juvenile normal human dermal fibroblasts. For the first time, the study also identified factors involved in fibroblast 3D-assembly.
Theek et al	2019	Surface Evaluation of Living Skin (SELS) parameter correlation analysis using data taken from astronauts working under extreme conditions of microgravity	Human (n=6)	Volar forearm skin	6 astronauts	Surface Evaluation of Living Skin (SELS)	6 months	Physiological	Roughness dropped for all astronauts during the flight (pre-flight: 1.17 AU, in-flight: 0.55 AU, post-flight: 1.36 AU). Scaling dropped during the flight for more than 65% of the astronauts (pre-flight: 1.42 AU, in-flight: 0.52 AU, post-flight: 1.42 AU). Wrinkles increased during the flight for more than 65% of the astronauts (pre-flight: 22.22 AU, in-flight: 27.61 AU, post-flight: 23.94 AU). In …
Garrett-Bakelman et al	2019	The NASA Twins Study: a multidimensional analysis of a year-long human spaceflight	Human (n=1)	Earth-based and spaceflight collections include blood, sorted cells (CD4, CD8, CD19, and LD), stool, buccal, saliva, urine, and AR blood. TCR, T cell receptor sequencing; T- and U-Metabolomics, targeted and untargeted metabolomics; OSI, oxidative stress and inflammation; T- and U-Proteomics, targeted and untargeted proteomics; CVU, cardiac and vascular ultrasound; VSF, vascular structure and func…		ISS (Twins)	1 year	Multi-omics	Skin findings: Collagen alpha-1(III) chain (COL3A1) and collagen alpha-1(I) chain (COL1A1) proteins in TW’s inflight urine were increased compared with preflight levels, and these values returned to baseline levels postflight. We also observed increased COL1A1, from measurements of two separate COL1A1 peptides, by untargeted proteomic analyses. We also observed an increase in the ratio of plasma …
Voorhies et al	2019	Study of the impact of long-duration space missions at the International space station on the astronaut microbiome	Human (n=9)	Microbiome of the gastrointestinal tract, skin, nose and tongue		ISS	6-12 months	Microbiomics	Alterations in the skin microbiome that might contribute to the high frequency of skin rashes/hypersensitivity episodes experienced by astronauts in space were also observed. Further inspection at the subject level showed that in fve out of the nine astronauts’ forehead and forearm samples, skin alpha diversity and richness became signifcantly higher in space. Noteworthy, skin microbial communiti…
Dunn et al	2018	Dermatologic manifestations in spaceflight: a review	Human	Meta-analysis			6 Months	Meta-Analysis	One physiologic change during spaceflight is an increase in dermal collagen, up to 143% of normal, found following a 6-month mission.astronauts after long-term space flights experience both thinning and loss of elasticity. At the end of a 6-month mission, the epidermis was shown to be reduced to 30 micrometers compared to normal epidermis
Jones et al	2008	SKIN ABRASION EFFECTS OF LUNAR DUST RELEVANT TO ASTRONAUTS	Human	General Review			N/A	General Review	The results indicate that lunar dust simulant (JSC1a) demonstrated abrasivity in the same range as commercial sandpaper. In addition, lunar dust simulant imbedded in cloth also exhibited a high level of abrasivity
Lehnhardt		What is the dermal and ocular toxicity of lunar dust?	Human	General Review			N/A	General Review	Given the unique properties of lunar and other celestial bodies' dust, there is a possibility that exposure could lead to serious health effects (e.g., respiratory, cardiopulmonary, ocular or dermal harm) or to crew performance impacts during celestial body missions.
Ahmadli et al	2014	Impact of Martian and Lunar dust simulants on cellular inflammation in human skin wounds ex vivo	Human	Skin explants		Ground, wound-healing	4 and 8 days		In comparison to Moon, Earth and no dust, especially highly oxidative Martian dust may increase inflamation in the skin when it is wounded.
Meyers et al	2012	Ocular toxicity of authentic lunar dust	Human	Rabbit trials & In Vivo Human trials (EpiOcularTM model utilizes human-derived epidermal keratinocytes that have been cultured to form a stratified corneal epithelium)		Ground, wound-healing	1, 24, 48 and 72 hours	Physiological	In vitro testing indicated minimal irritancy potential based on the time required to reduce cell viability by 50% (ET50). Follow-up testing using the Draize standard protocol confirmed that the lunar dust was minimally irritating. Minor irritation of the upper eyelids was noted at the 1-hour observation point, but these effects resolved within 24 hours. In addition, no corneal scratching was obse…
Linnarsson et al	2012	Toxicity of lunar dust						General Review	Summary of previous studies conducted on toxicity of lunar dust and the effects on humans. Current research on limits for permissible exposure to dust are incomplete or absent. To properly assess risk for humans during future manned space explorations, more in situ determinations of factors such as abundance, size determination, and chemical reactivity of lunar dust are required.
James et al		Risk of Adverse Health Effects from Lunar Dust Exposure	Human	Cardiovascular system		Ground and spaceflight (Apollo crew reports)			Prolonged exposure to respirable lunar dust can be detrimental to human health. Evidence was collected from accounts of astronauts on Apollo 11, 12, 14-17 missions, such as accounts of post-flight allergic reactions and impacts on performance. Ground-based evidence contributed to increased mechanistic understanding of lunar dust.
Rehnders et al	2011	Effects of lunar and mars dust simulants on HaCaT keratinocytes and CHO-K1 fibroblasts		Keratinocytes and fibroblasts					The moon's dust can cause dermal irritations due to its small particle size, and it being especially reactive. The experiment indicates that keratinocyte proliferation was suppressed in sub-confluent cultures exposed to the lunar dust simulant. Furthermore, the keratinocyte monolayers from scratch-wounding experience a delay in regeneration when exposed to lunar dust simulant.
Riwaldt et al	2017	Preparation of A Spaceflight: Apoptosis Search in Sutured Wound Healing Models	Human culture	Skin culture (full skin)		Ground, wound-healing	10 days		Initially, determining the possibility of maintaining live skin tissue in spaceflight. Once this was confirmed to be possible, transitioned to designing a wound-healing model for future spaceflights. Apoptosis inhibitors and activators were tested for the models, as well as genes that played a role in apoptosis inhibition. The methods proved to be applicable for post-flight analysis of the skin t…
Tereda et al*	2017	Poster 1: Ionizing radiation affects gene expression in mouseskin and bone	Mice	Skin; Femur	6 male mice, 16 weeks of age	Ground, radiation	11 days		Determining whether skin can be used to predict how bone responds to simulated microgravity and radiation. RNA extracted from skin and femur. qPCR was performed on a set of skin genes. Results suggest that early radiation induced changes in the FGF18 gene expression in skin might be able to predict subsequent loss of bone mass.
Tereda et al*	2017	Poster 2: Effects of ionizing radiation on murine gene expression in skin and bone	Mice	Skin; Femur	6 male mice, 16 weeks of age	Ground, radiation	11 days		Determining whether skin can be used to predict how bone responds to simulated microgravity and radiation. RNA extracted from skin and femur. qPCR was performed on a set of skin genes. Results suggest that early radiation induced changes in the FGF18 gene expression in skin might be able to predict subsequent loss of bone mass.
Ranieri et al	2017	Simulated microgravity triggers epithelial mesenchymal transition in human keratinocytes	Human culture	Keratinocytes cell culture		Ground, microgravity	6-60 hours		Studying the changes on the regenerative abilities and response to tissue damage on human epidermal cells through analyzing the effects of the simulated microgravity on the re-epithelialization phase of repairing and healing woulds. Found that simulated exposure to microgravity of human keratinocytes promotes a migratory behavior, triggering the EMT through expression of typical transcription fac…
Arora	2017	Aerospace Dermatology	Human			(review)	-		Review of physiological effects of this environment on skin, effect of common dermatoses in aerospace environment, and effect of microgravity on skin.
Tereda et al	2016	Effects of a Closed Space Environment on Gene Expression in Hair Follicles of Astronauts in the International Space Station	Human (n=10)	Hair		ISS (HAIR)	6 months	Proteomics	In some astronauts, genes related to hair growth such as FGF18, ANGPTL7 and COMP were upregulated during flight, suggesting that spaceflight inhibits cell proliferation in hair follicles.
Sugita et al	2016	Comprehensive analysis of the skin fungal microbiota of astronauts during a half-year stay at the International Space Station	Human (n=10)	Skin (chest and cheek)		ISS (Sugita)	6 months	Microbiomics	At the species level, M. restricta, M. globosa, and M. sympodialis were more abundant. In the chest samples, the ratio of M. restricta to all Malassezia species increased, whereas it did not change considerably in cheek samples. Fungal diversity was reduced, and the ratio of Malassezia to all fungal colonization increased during the astronauts' stay at the ISS. The ascomycetous yeast Cyberlindner…
Crucian et al	2016	A case of persistent skin rash and rhinitis with immune system dysregulation onboard the International Space Station	Human (n=1)			ISS	6 months		A worsening of rash symptoms occurred around mission day 33, immediately after an EVA, and coinciding with a period of notable on-orbit operations. On mission day 73, the rash flared to its worst point in the 6-month mission, described by the crewmember as 10þ. We retrospectively anticipate, based on rash locations, appearance, and discomfort and/or itch, that this level of severity would corresp…
Neutelings et al	2015	Skin physiology in microgravity: a 3-month stay aboard ISS induces dermal atrophy and affects cutaneous muscle and hair follicles cycling in mice	Mice (n=3)	Skin (head and tail, on dorsal and lateral)		ISS (MDS)	91 days	Physiological, Transcriptomics	A significant reduction of dermal thickness (−15%, P=0.05) was observed in S mice accompanied by an increased newly synthetized procollagen (+42%, P=0.03), likely reflecting an increased collagen turnover. Transcriptomic data suggested that the dermal atrophy might be related to an early degradation of defective newly formed procollagen molecules. Interestingly, numerous hair follicles in growing…
Checinska et al	2015	Microbiomes of the dust particles collected from the International Space Station and Spacecraft Assembly Facilities	-	Dust from ISS		ISS	-	Microbiomic	Statistical analyses showed that members of the phyla Actinobacteria, Firmicutes, and Proteobacteria were dominant in the samples examined but varied in abundance. Actinobacteria were predominant in the ISS samples whereas Proteobacteria, least abundant in the ISS, dominated in the cleanroom samples. The viable bacterial populations seen by PMA treatment were greatly decreased. However, the treat…
König et al	2015	Multiphoton tomography of astronauts				ISS	half a year		Thinning of the vital epidermis, a decrease of the autofluoresence intensity, an increase in the long fluorescence lifetime, and a reduced skin ageing index SAAID based on an increased collagen level in the upper dermis have been found
Mao et al	2014	Biological and metabolic response in STS-135 space-flown mouse skin	Mice (n=6)	Skin		STS-135	13 days	Transcriptomics, Metabolomics	Of 332 named biochemicals, 19 differed significantly (p < 0.05) between space flight skin samples and AEM ground controls, with 12 up-regulated and 7 down-regulated. Oxidative Stress Genes Several genes playing a central role in regulating ROS production were up-regulated following space flight. These included: amyotrophic lateral sclerosis 2 (Als2); catalase (Cat); flavin containing monooxygenas…
Tereda et al*	2013	Genetic and Proteomics Analyses of Space Flown Mice Skin	Mice (n=3)	Skin		ISS (MDS)	91 days	Proteomics	The results of microarray analysis suggested that the number of the changed genes were depended on the period of the exposed environment. 2) The 55 genes were changed in common among long term-space flight, short term-space fligh and 3 months-hindlimb suspension
Tronnier et al	2008	Change in Skin Physiological Parameters in Space – Report on and Results of the First Study on Man	Human (n=1)	-		ISS (SkinCare/Skin-A)	3 months	Physiological	When the photographs of the skin before and after the mission were compared, coarser skin surface fields were noticed. The loss of skin elasticity after the stay in space is confirmed by changes in the ultrasound picture of the skin.
Longnecker et al	2004	Review of NASA's Longitudinal Study of Astronaut Health				Meta-Analysis	Years	Meta-Analysis	suggested increased incidence and earlier appearance of cataracts in astronauts exposed to higher amounts of space radiation. Fourteen cases of cancer (excluding 33 cases of non-melanoma skin cancer) were diagnosed among the 312 astronauts followed from 1959 to the present.
Seitzer et al	1995	Microgravity and hypergravity effects on collagen biosynthesis of human dermal fibroblasts	Human culture			Spacelab D2-mission in 1993.	4, 7, 10, and 20 h	Proteomics	Quantitative analysis revealed an increase of collagen synthesis under microgravity conditions, being up to 143% higher than in 1 g controls. In contrast, hypergravity samples showed a decrease in collagen synthesis with increasing g, being at the 13% level at 10 g.
